# Supplementary material for: Transcriptome profiling of abdominal aortic tissues reveals alterations in mRNAs of Takayasu arteritis
Source: Front Genet. 2022 Nov 16;13:1036233. doi: 10.3389/fgene.2022.1036233 (PMC9709398; doi:10.3389/fgene.2022.1036233)
Supplement: Supplementary file 6 [file Table1.xlsx]

## Sheet: Sheet1
IL4I1
IL1RN
IL13RA1
IL6
IL6R
IL1RAP
IL1R2
IL18RAP
IL18R1
IL12RB2
IL1RL1
IL1R1
IL4R
IL1RL2
